# Supplementary material for: Edge dominated electronic properties of MoS2/graphene hybrid 2D materials: edge state, electron coupling and work function
Source: Royal Society of Chemistry journal article supplement (doi:10.1039/c7tc00816c), 2017-01-01
Supplement: c7tc00816c1.pdf [file c7tc00816c1.pdf]

## Supporting Information

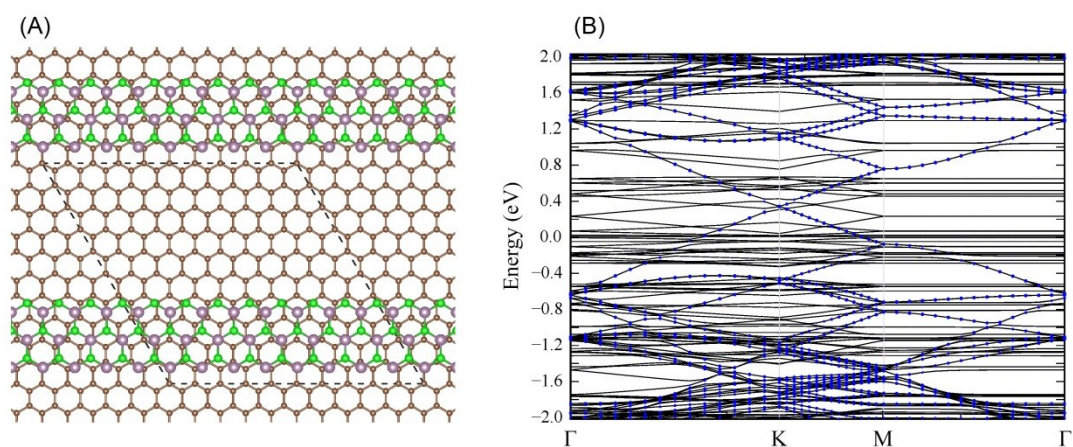

**Figure 1.** (A) Top view of MoS<sub>2</sub> ribbon/Gra at the same inter-layer distance to that of MoS<sub>2</sub> monolayer/Gra; (B) Band structure of ribbon/Gra. It is clear that the overall shape is similar to the ribbon/Gra with optimized distance (Fig. 2 in the manuscript). Thus it is safe to conclude that the resulted different electronic properties of MoS<sub>2</sub> structures on graphene is totally due to the influence of edges.
